# Supplementary material for: {116} faceted anatase single-crystalline nanosheet arrays: facile synthesis and enhanced electrochemical performances
Source: Royal Society of Chemistry journal article supplement (doi:10.1039/c4nr04248d), 2014-01-01
Supplement: c4nr04248d1.pdf [file c4nr04248d1.pdf]

**Electronic Supplementary Information for:**  
**{116} faceted anatase single-crystalline nanosheets arrays:**  
**facile synthesis and enhanced electrochemical performances**

Feng Li,<sup>†</sup> Xiaoning Li,<sup>a</sup> Shangfeng Yang,<sup>a,c</sup> Zhengping Fu,<sup>\*,a,c</sup> and Yalin Lu<sup>\*,a,b,c</sup>

<sup>a</sup>CAS Key laboratory of Materials for Energy Conversion, Department of Materials Science and Engineering, University of Science and Technology of China, Hefei 230026, P. R. China

<sup>b</sup>National Laboratory for Physical Sciences at the Microscale, University of Science and Technology of China, Hefei 230026, P. R. China

<sup>c</sup>Synergetic Innovation Center of Quantum Information & Quantum Physics, University of Science and Technology of China, Hefei 230026, P. R. China

**Synthesis process of polycrystalline anatase TiO<sub>2</sub> nanosheet array assembled by TiO<sub>2</sub> nanocrystallites with {116} facets parallel to the nanosheet surface in our former work.**

In a typical synthesis, the FTO coated glass was ultrasonically cleaned sequentially in acetone, ethanol, distilled water for 15 min each, subsequently immersed in a 1 M NaOH aqueous solution for 24 h, then rinsed with distilled water, and finally dried in the air. A TiO<sub>2</sub> seed layer was prepared on the as-cleaned FTO coated glass by spin coating method. 1.5 ml of titanium butoxide was added dropwise to 20 ml of toluene, the mixture was stirred at ambient conditions for 5 min before the addition of 0.6 ml of hydrofluoric acid. After stirring for another 5 min, the mixture was transferred to a dried 50 ml Teflon-lined autoclave within a piece of FTO coated glass substrate placed vertically, and kept at 70 °C for 24 h. After synthesis, the FTO substrate was taken out, washed with ethanol and distilled water, then dried in air to obtain the precursor. TiO<sub>2</sub> nanosheet array was prepared after the precursor annealed at 500 °C in air for 2 h.

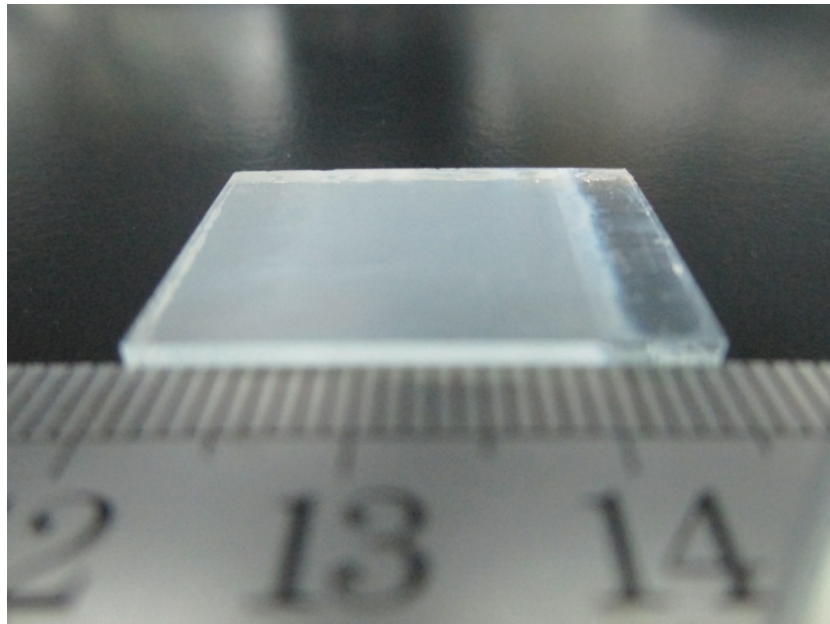

Fig. S1. Photo of LTNF-116 grown on a 2.5 cm x 2.0 cm area FTO substrate uniformly.

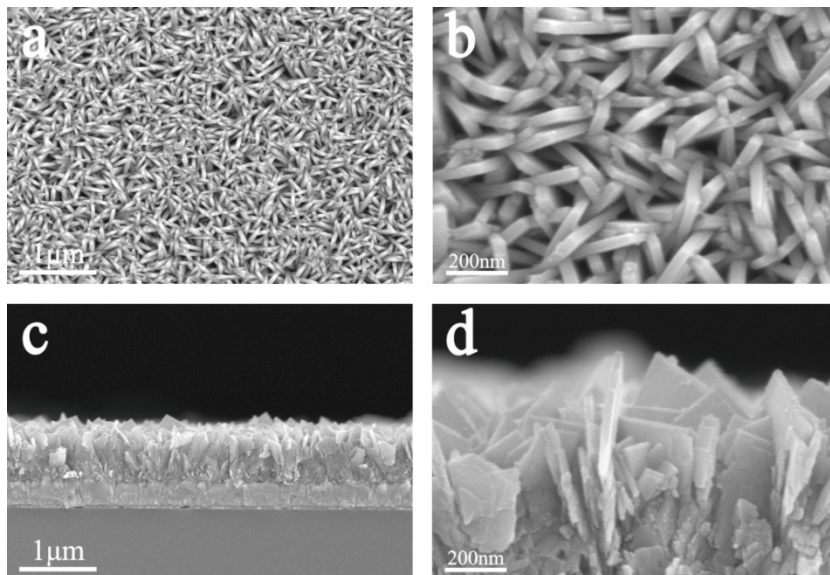

Fig. S2. FESEM images of LTNF-001 grown on FTO substrate in 20 ml toluene, 3.0 ml titanium butoxide, and 1.2 ml hydrofluoric acid at 180 °C for 24h.

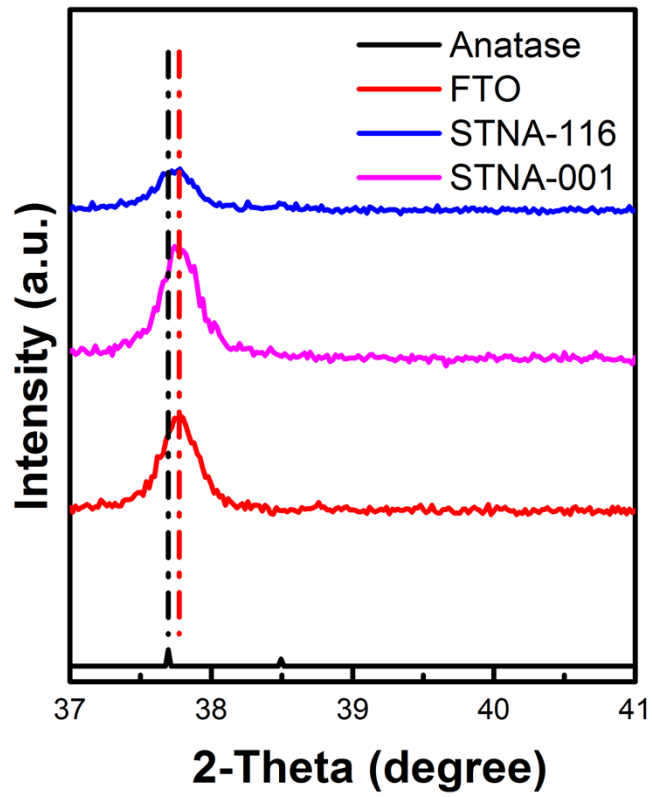

Fig. S3. Enlarged XRD patterns of the samples.

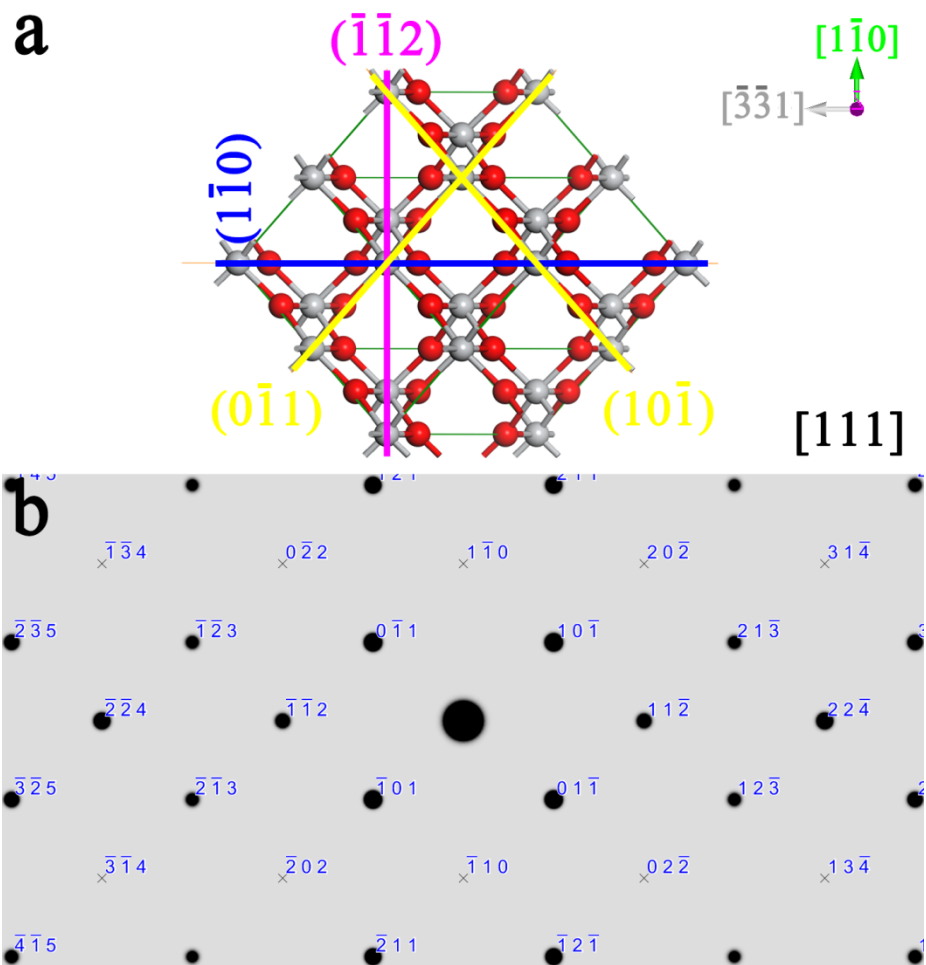

Fig. S4. (a) Crystal structure model along anatase  $\text{TiO}_2$   $\{116\}$  facets, viewed from  $[111]$  zone. (b) Corresponding simulated SAED pattern ( $\langle 111 \rangle$  zone diffraction).

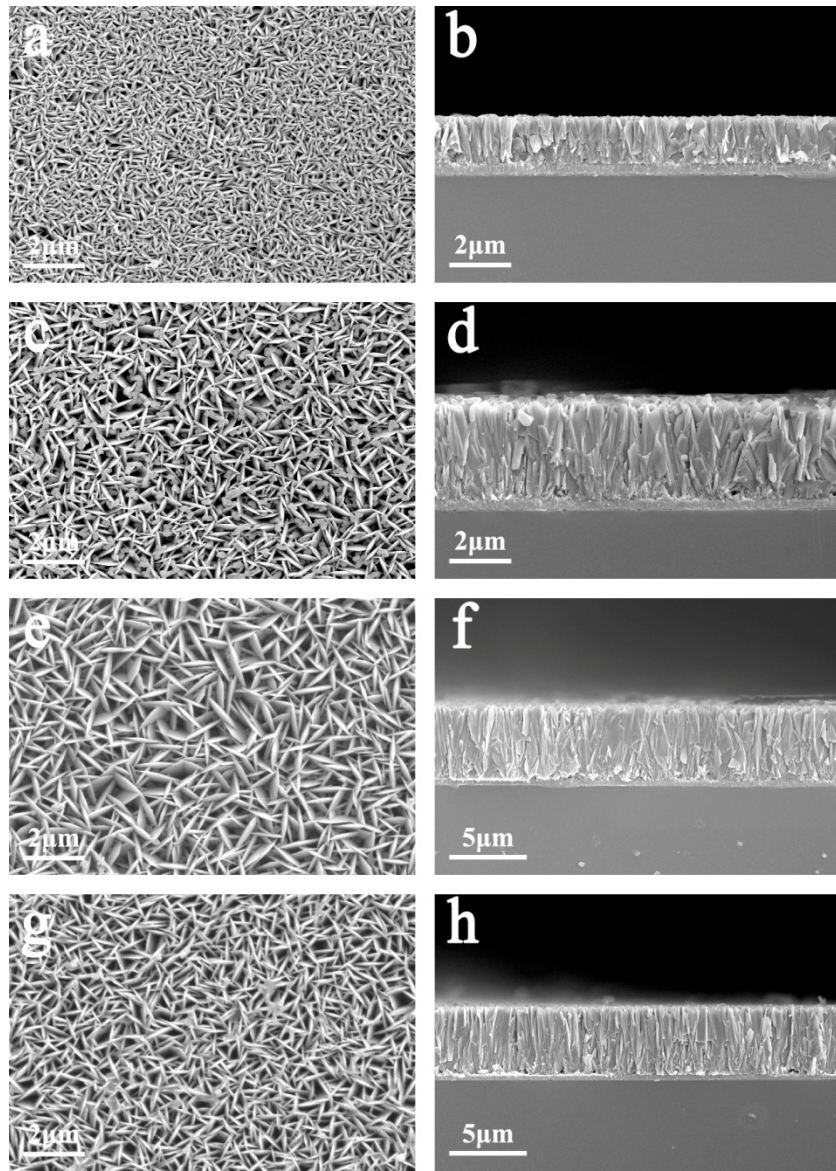

Fig. S5. FESEM images of LTNF-116 grown on FTO substrate in 15 ml ethanol, 1.0 ml titanium butoxide, and 1.0 ml hydrofluoric acid at 200 °C for (a, b) 4 h, (c, d) 8 h, (e, f) 12 h, (g, h) 16 h.

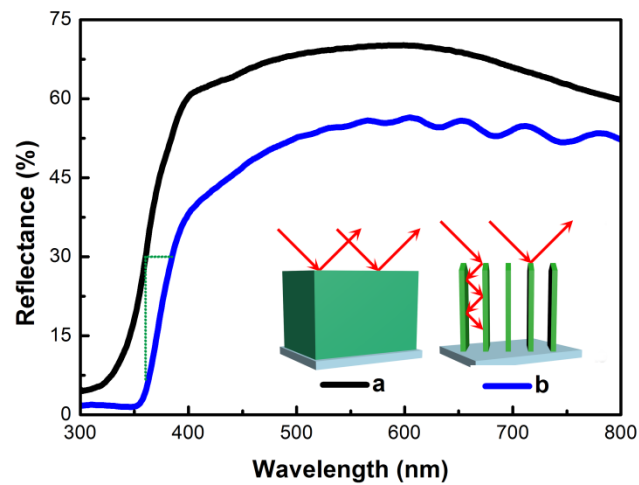

Fig. S6. Reflectance spectra of (a) P25 film and (b) STNA-116 with the same film thickness. The insets are corresponding light path diagram.

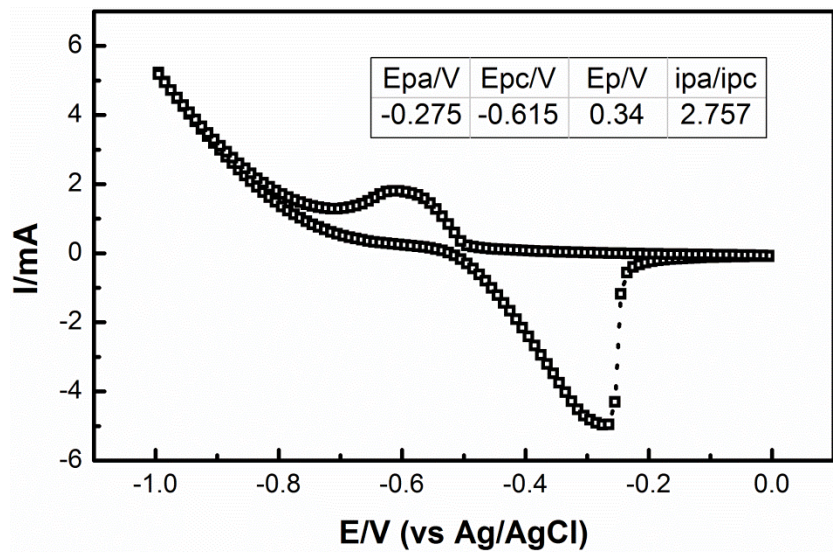

Fig. S7. Cyclic voltammograms of P25 electrode in 0.5 M H<sub>2</sub>SO<sub>4</sub>. Scan rate: 50 mVs<sup>-1</sup>. Insets are corresponding electrochemical characteristics.
